# Supplementary material for: NDP52 activates nuclear myosin VI to enhance RNA polymerase II transcription
Source: PubMed Central journal article supplement (PMC5707354; doi:10.1038/s41467-017-02050-w), 2017-11-30
Supplement: 41467_2017_2050_MOESM1_ESM.pdf [file 41467_2017_2050_MOESM1_ESM.pdf]

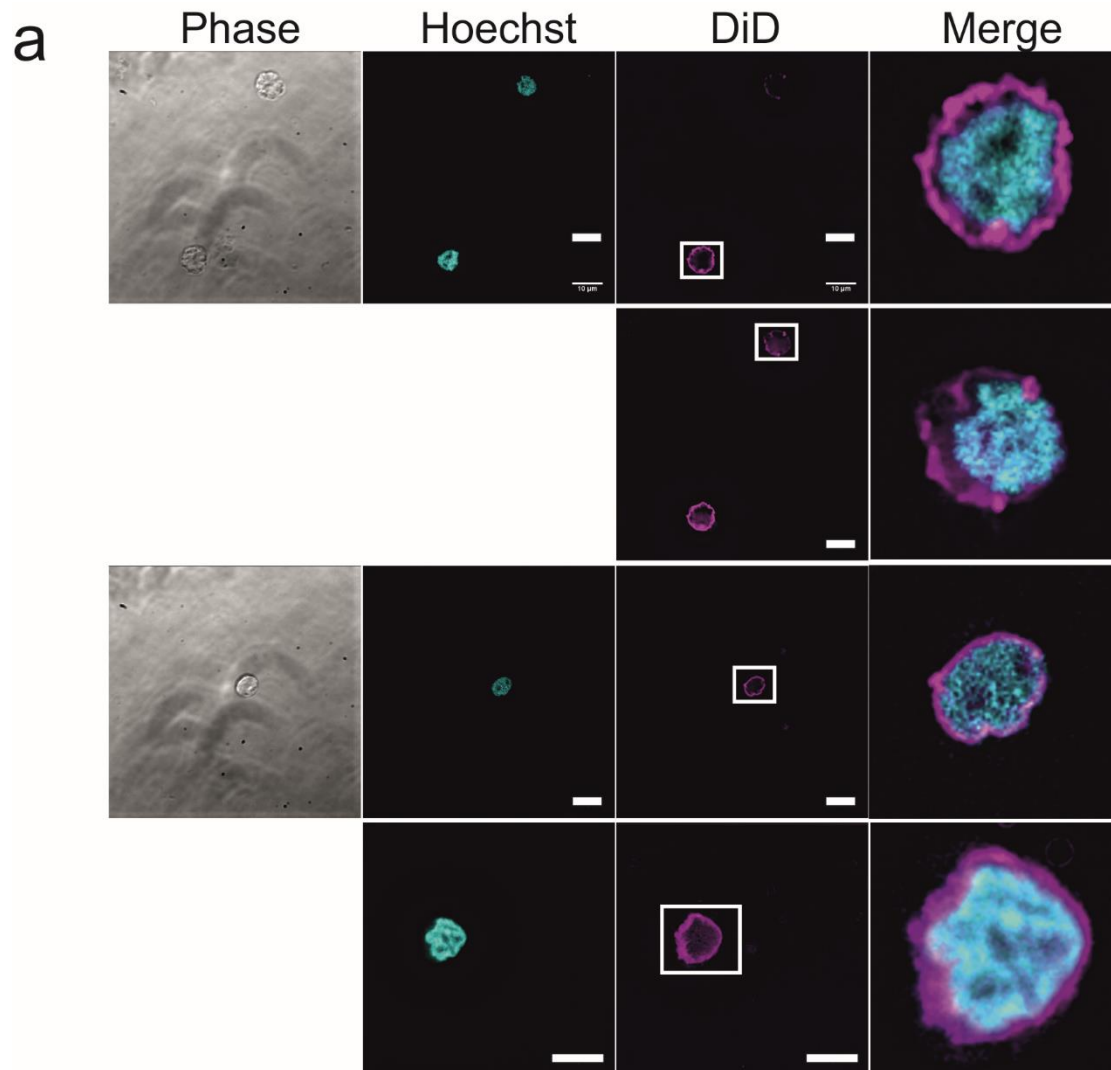

**Supplementary Figure 1.**

(a) Examples of purified HeLa nuclei. Nuclei were stained with the DNA dye Hoechst 33342 and the lipophilic dye DiD. The staining showed that the purified nuclei appeared intact 3-D organelles, surrounded by membrane and maintaining not only their DNA content, but also preserving structures like the nucleoli (See Supplementary Movie 3 and 4). Images were acquired at the mid-point of the nucleus. Scale bar 10  $\mu\text{m}$ .

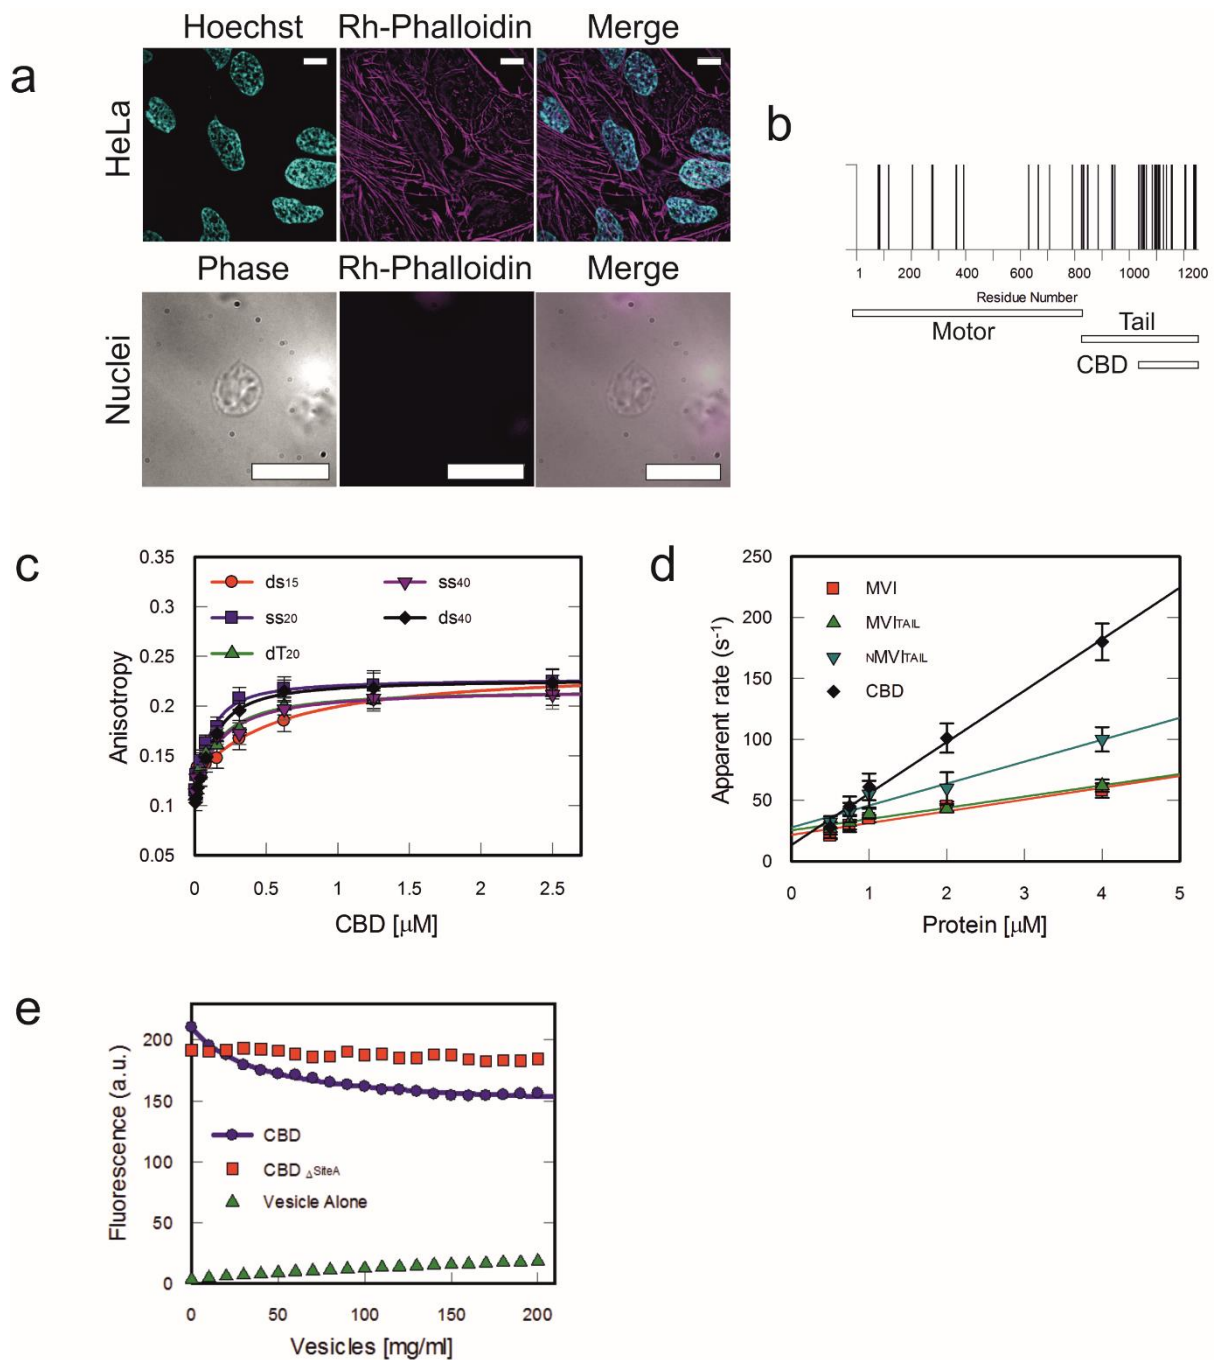

### Supplementary Figure 2.

(a) Staining for filamentous actin. To assess whether the filamentous structures seen by the immunofluorescence staining of MVI were nuclear actin filaments, fixed HeLa cells and isolated nuclei were stained with Rhodamine-Phalloidin and Hoechst 3342. However, the lack of phalloidin staining in the nucleus suggested that these structures are not actin-based. Images were acquired at the mid-point of the nucleus. Scale bar 10  $\mu$ m.

(b) Prediction of DNA binding residues using BindN (<http://bioinformatics.k-state.edu/bindn/>). Bars indicate residues with a predicted confidence greater than 70%. A full list of residues are presented in Supplementary Table 1. A majority of sites are clustered in the CBD.

(c) Fluorescence anisotropy titrations of the CBD domain against various FAM-DNA substrates (50 nM). Data fitting was performed as described in Methods.  $K_d$ : ds<sub>15</sub> 500 +/- 45 nM, ss<sub>20</sub> 110 +/- 35 nM, dT<sub>20</sub> 120 +/- 25 nM, ss<sub>40</sub> 120 +/- 35 nM and ds<sub>40</sub> 100 +/- 20 nM. Data were averaged from three independent experiments.

(d) Fluorescence anisotropy was measured in stopped flow pre-steady-state measurements. MVI domains were rapidly mixed against 50 nM 40 bp FAM-DNA. Traces were fitted as described in the Methods to yield the rate constants plotted in d. Association and dissociation rate constants were calculated from linear fits to the data (Supplementary Table 3). Data were averaged from three independent experiments.

(e) Titration of Folch vesicles against 1  $\mu$ M CBD or CBD $\Delta$ SiteA. Data were fitted as described in Methods, following background subtraction of the folch auto-fluorescence. Fitting gives an indication of the affinity with  $K_d$  39 +/- 4 mg/ml. Due to the unknown mixed composition, it was not possible to have molar concentrations. Poor binding by CBD $\Delta$ SiteA means data could not be fitted to the model.

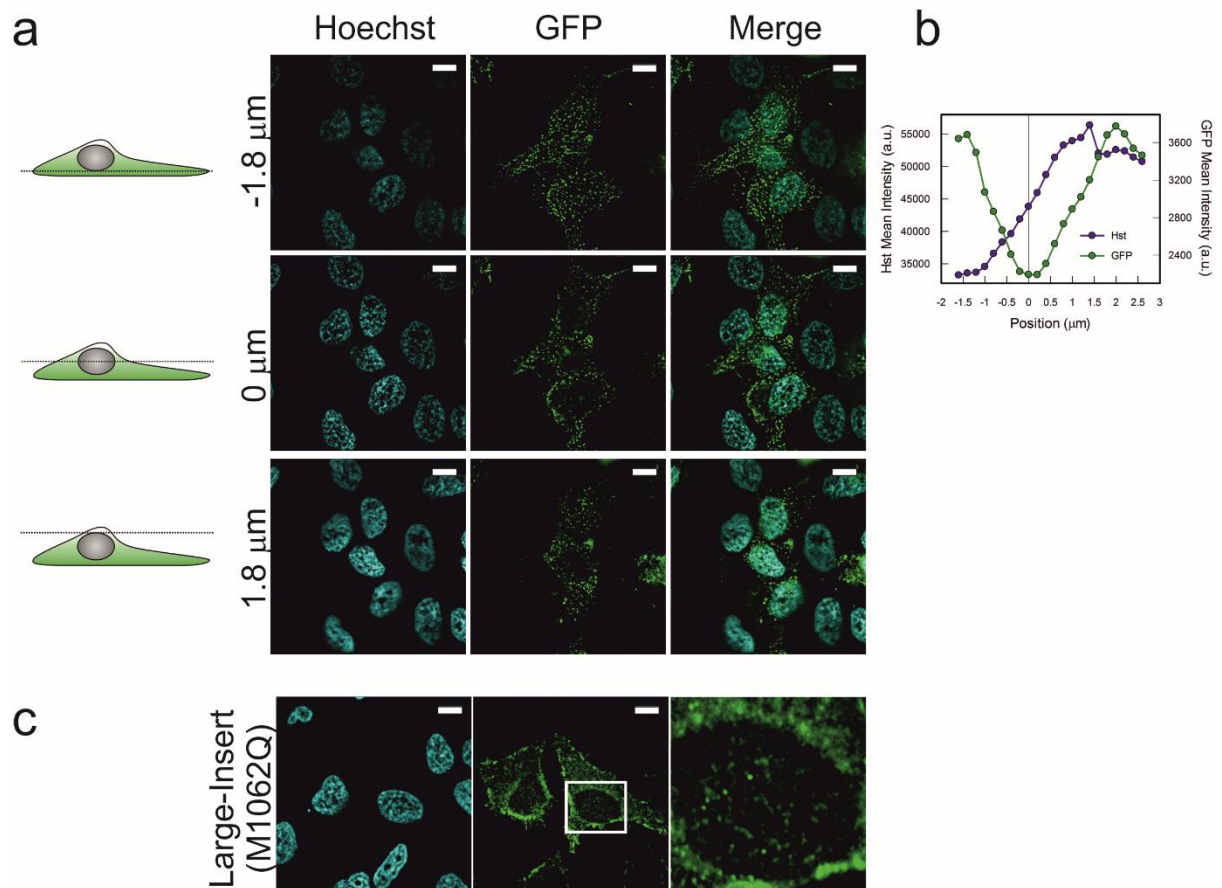

### Supplementary Figure 3.

(a-b) Intracellular distribution of EGFP-LI-MVI transiently expressed in HeLa cells. The EGFP-LI-MVI localisation was restricted to the cell periphery, being excluded from the nucleus. This is highlighted by the plot of mean intensity of Hoechst (Hst) and EGFP across each image stack. The position is measured relative to the mid-point of the nucleus. The intensity was measured within a region of interest through the centre of the nucleus. Scale bar 10  $\mu\text{m}$ .

(c) Intracellular distribution of EGFP-LI-MVI(M1062Q). The mutant, in which the LI helix is destabilised, displayed a similar distribution to the NI isoform. Images were acquired at the mid-point of the nucleus. Scale bar 10  $\mu\text{m}$ .

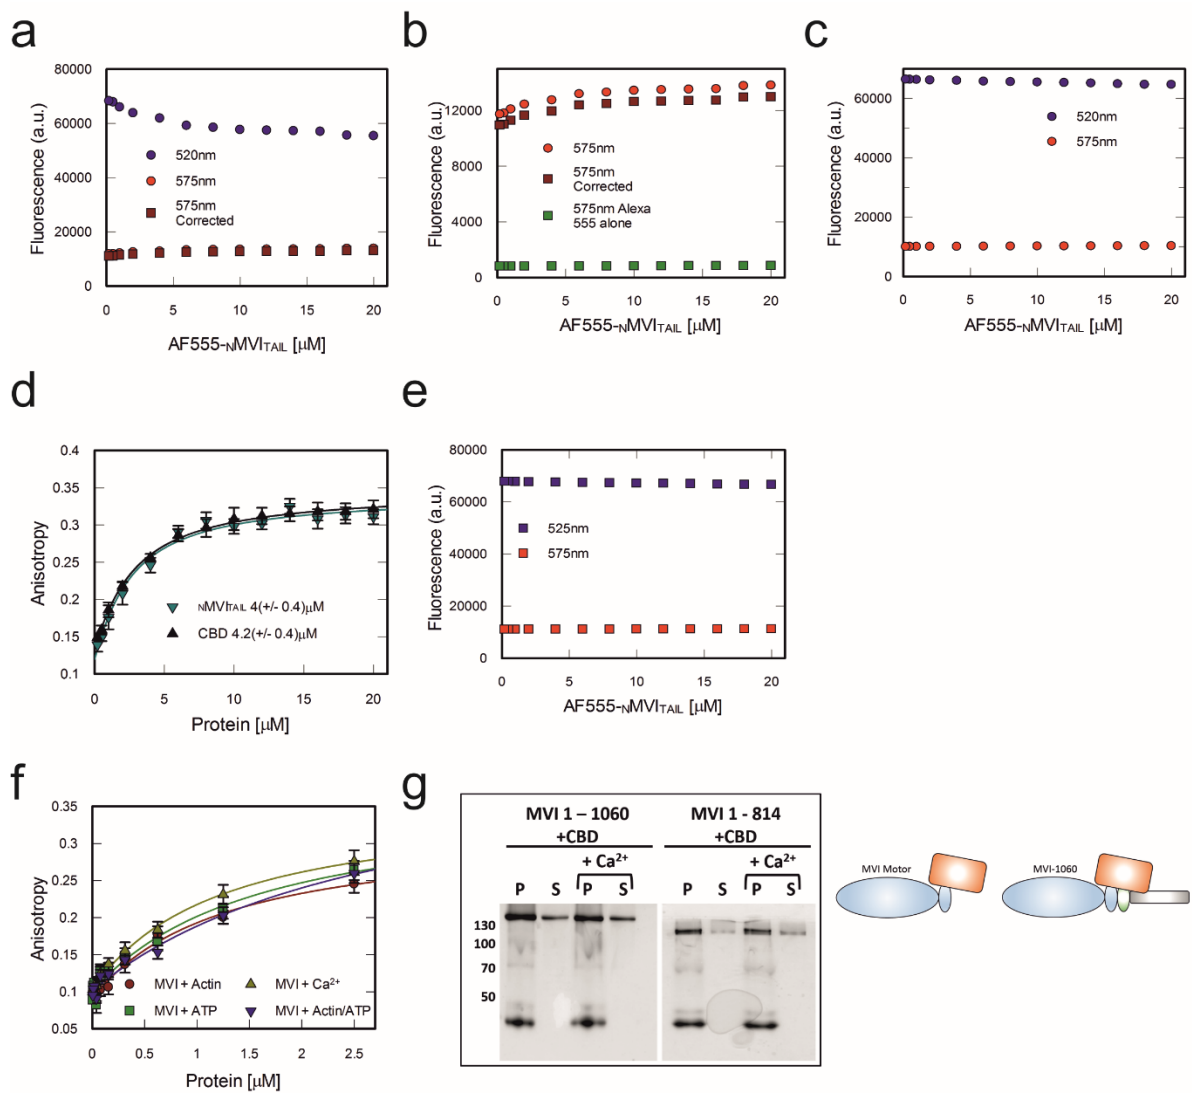

#### Supplementary Figure 4.

- (a) Raw fluorescence intensity data for titration of  $nMVI_{TAIL}$  against CBD in Fig. 3a.
- (b) Raw intensity data as shown in (a) but on a smaller scale.
- (c) Raw fluorescence intensity data for titration of  $nMVI_{TAIL}$  against CBD in the presence of DNA (Blue is FITC intensity and Red is AF555 intensity).
- (d) Fluorescence anisotropy titration of  $nMVI_{TAIL}$  against FITC-CBD and CBD against FITC- $nMVI_{TAIL}$ . Data were fitted as described in Methods for the DNA substrates with  $K_d$  +/- SEM.
- (e) Raw fluorescence intensity data for titration of  $nMVI_{TAIL}$  against CBD in the presence of NDP52. (Blue is FITC intensity and Red is AF555 intensity)
- (f) Fluorescence anisotropy titrations of FL MVI against a 40 bp FAM-DNA (50 nM) in the presence of F-Actin (5  $\mu M$ ),  $Ca^{2+}$  (1 mM), ATP (2 mM) and Actin-ATP. Data fitting

was performed as described in Methods. Data were averaged from three independent experiments.

(g) Pull-down of CBD (5  $\mu$ M) by His-tagged Motor<sup>1-1060</sup> and Motor<sup>1-814</sup> both at 10  $\mu$ M +/- 1 mM Ca<sup>2+</sup>. P and S represent pellet and supernatant fractions, respectively. Interaction of the CBD with the motor constructs is shown in the cartoon scheme.

**a**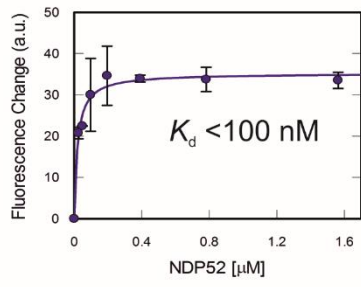**b**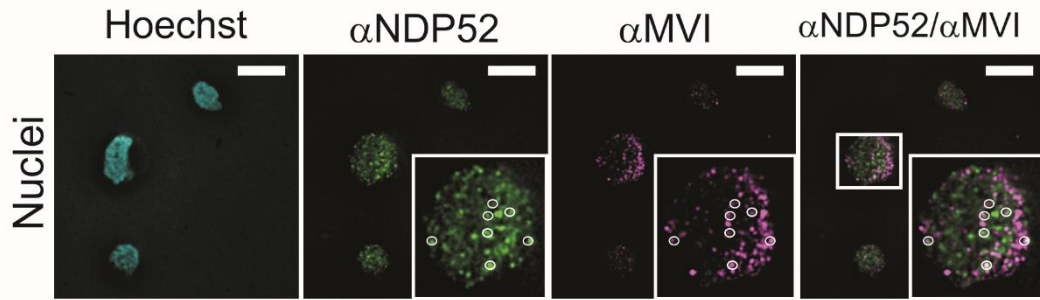**c**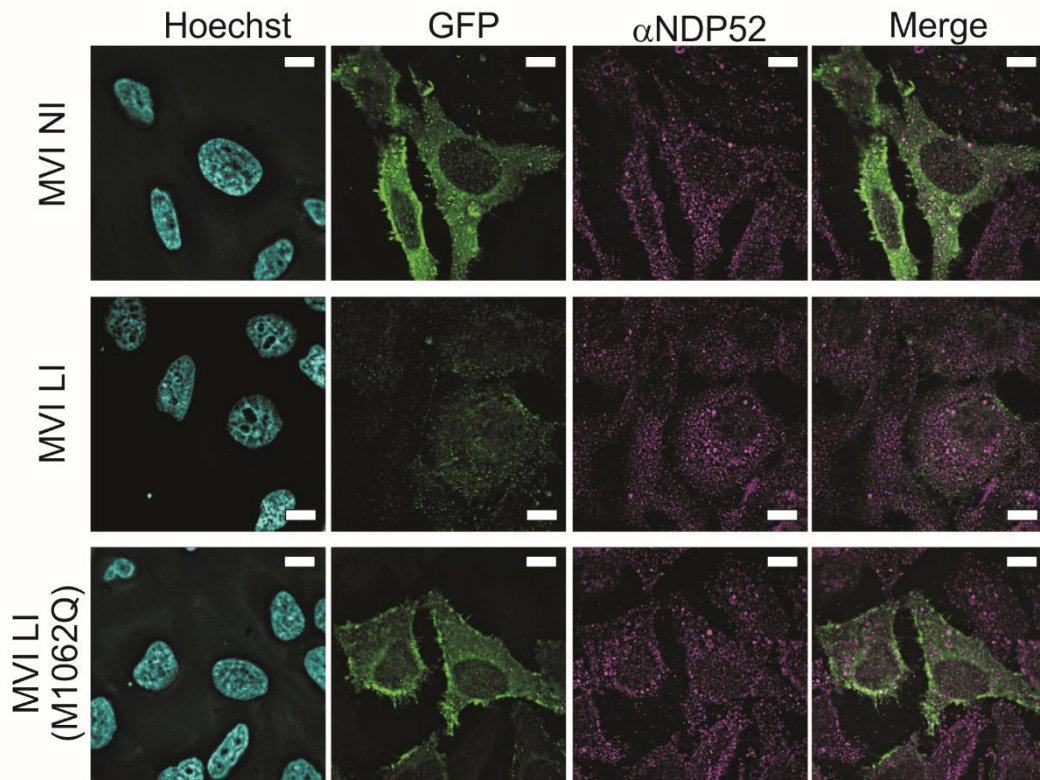**d**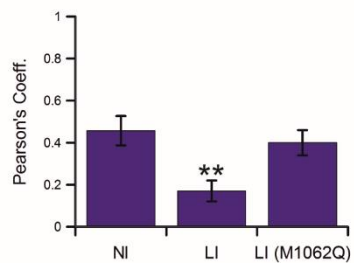

### Supplementary Figure 5.

(a) Fluorescence intensity titration of NDP52 against a 40 bp FAM-DNA substrate (50 nM). Data fitting was performed as described in Methods. Data were averaged from three independent experiments.  $K_d$ : ds<sub>40</sub> 80 +/- 25 nM

(b) Immunofluorescence staining against NDP52 (green), MVI (magenta) and DNA (cyan) on isolated HeLa nuclei, as performed in Fig. 1b. Insert depicts co-localising foci. Scale bar 10  $\mu$ m.

(c) Representative images of transiently expressed NI-, LI- and LI (M1062Q) -EGFP-MVI in HeLa cells stained against DNA (Cyan) and immune-stained against endogenous NDP52 (magenta). Scale bar 10  $\mu$ m. These images were used to assess the significance of the Pearson's coefficient regarding MVI and NDP52 co-localisation. We have established how the NI and LI (M1062Q) can form interactions with NDP52. Therefore, to assess this *in vivo* through imaging, we performed the Pearson's coefficient test (d) with the three MVI constructs. Here a region of interest was drawn around the cells and images were analysed from 5 different stacks. LI MVI shows a significantly lower co-localisation than the NI or mutant \*\*p <0.001.



a

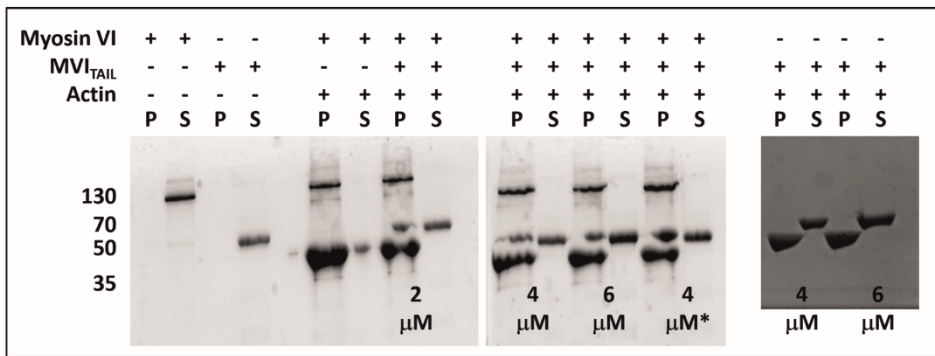

b

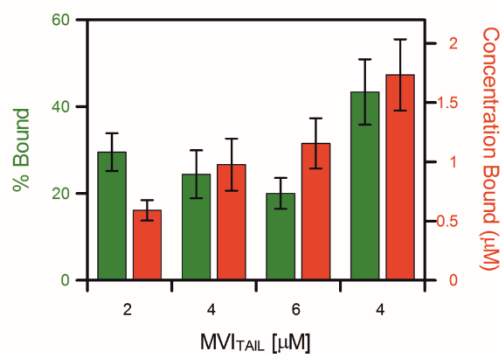

c

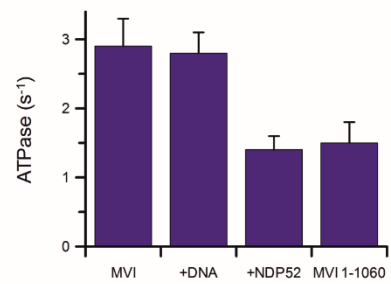

d

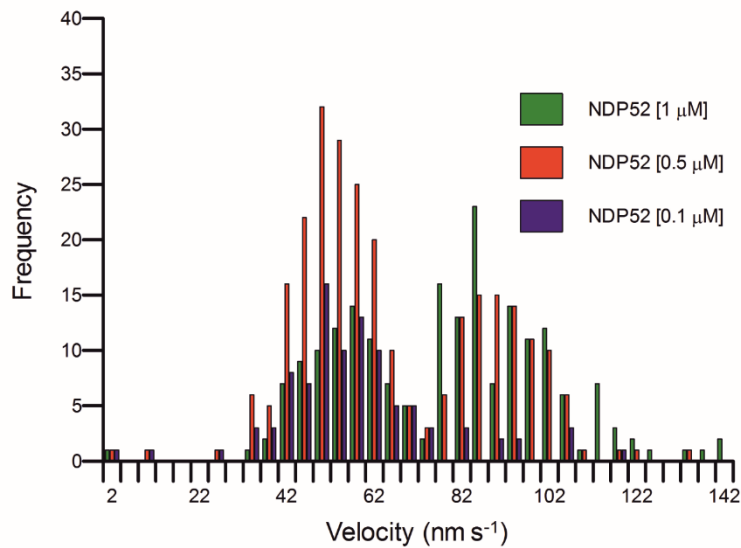

### Supplementary Figure 6.

(a) Actin co-sedimentation assay. 1  $\mu\text{M}$  MVI was incubated with the indicated concentrations of MVI<sub>TAIL</sub> before sedimentation in the presence of 5  $\mu\text{M}$  F-actin, as described in the Methods. Except for the 4  $\mu\text{M}^*$  condition where 2  $\mu\text{M}$  MVI was used. P and S represent pellet and supernatant fractions, respectively.

(b) Gel densitometry was used to determine the relative % of MVI<sub>TAIL</sub> in the actin pellet (Green bars). The % bound was then converted into the concentration of bound species (Red bars) (Error bars represent SEM).

(c) Plots of MVI or Motor<sub>1-1060</sub> ATPase rate constants in the presence of 5  $\mu$ M DNA or NDP52 under conditions described in the Methods. Error bars represent SEM.

(d) Velocity histogram from sliding filament assay with MVI immobilised through the stated concentrations of NDP52.

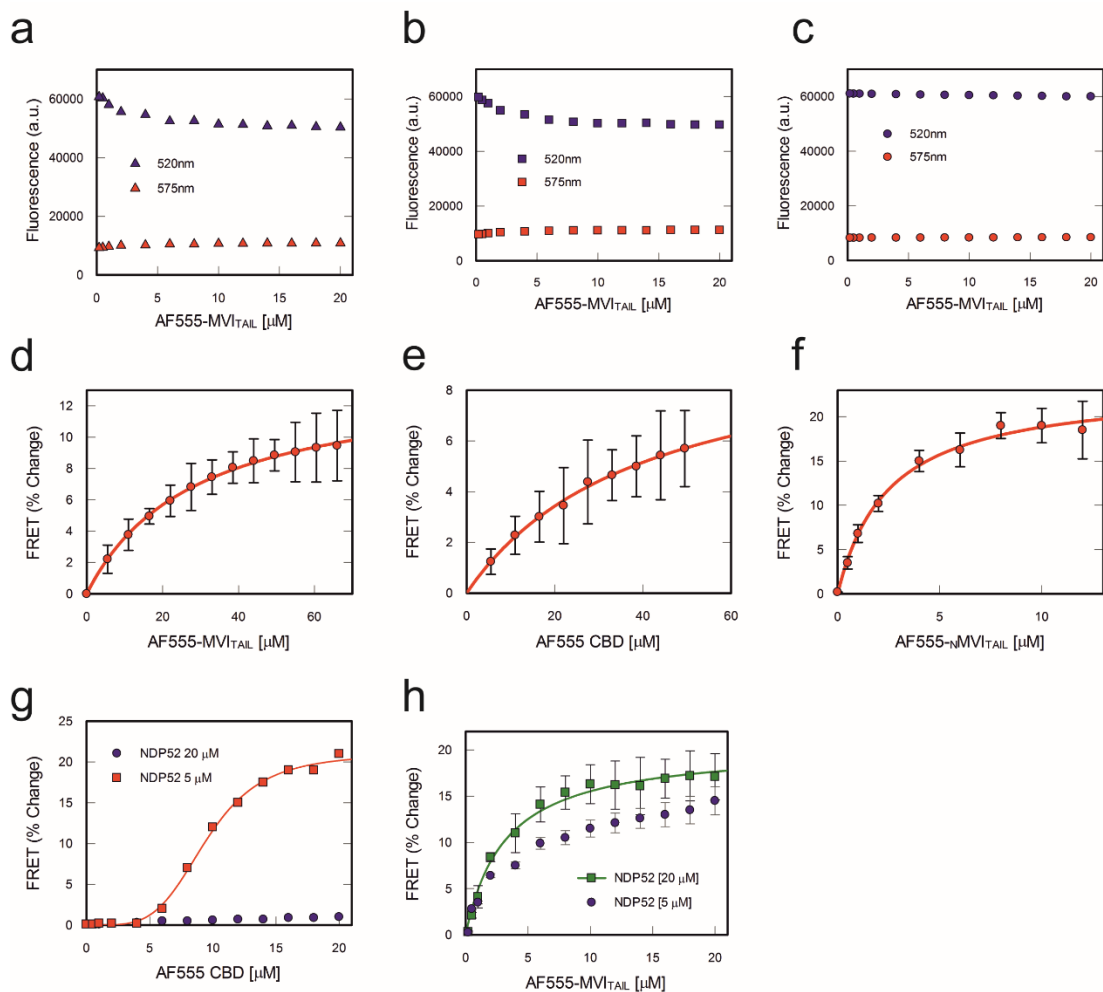

### Supplementary Figure 7.

(a) Raw fluorescence intensity data for titration of AF555-MVITAIL against FITC-MVITAIL in the presence of 20 μM NDP52. (a-c) Blue is FITC intensity and Red is AF555 intensity.

(b) Raw fluorescence intensity data for titration of AF555-MVITAIL against FITC-MVITAIL in the presence of 20 μM DNA/NDP52.

(c) Raw fluorescence intensity data for titration of AF555-MVITAIL against FITC-MVITAIL.

(d) FRET titration of AF555-MVITAIL against FITC-MVITAIL over a larger concentration range.

(e) FRET titration of AF555-CBD against FITC-CBD.

(f) FRET titration of AF555-nMVITAIL against FITC-nMVITAIL.

(g) FRET titration of AF555-CBD against FITC-CBD in the presence of 5 μM or 20 μM NDP52. For F-G, fitting was performed as described in the Methods.

(h) FRET titration of AF555-MVITAIL against FITC-MVITAIL in the presence of 5 μM or 20 μM NDP52.

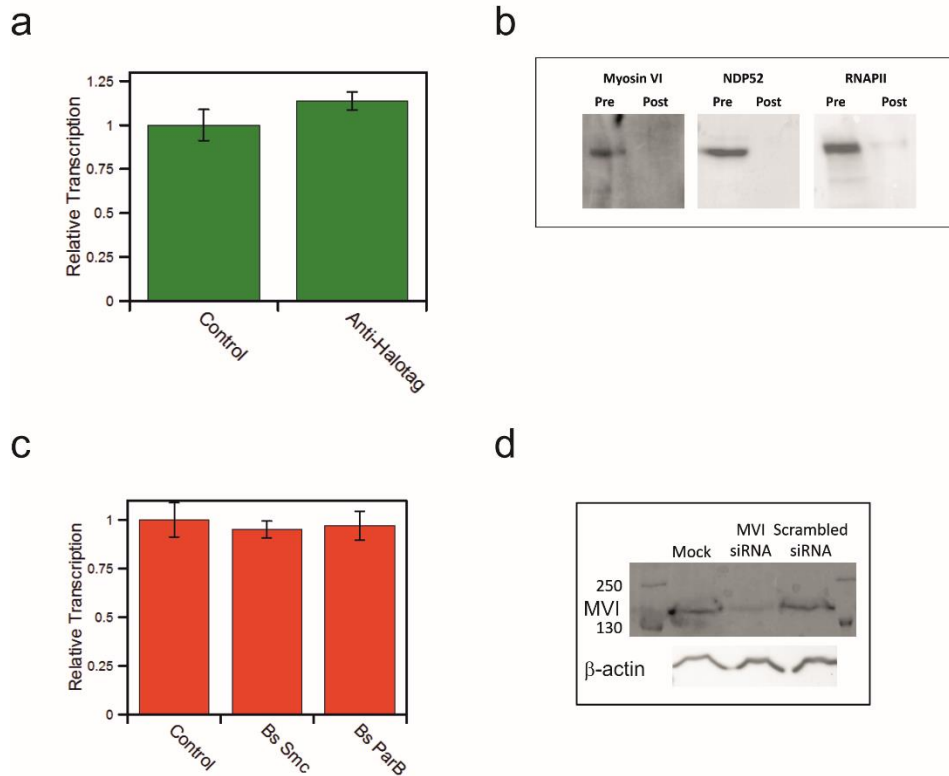

### Supplementary Figure 8.

(a) *In vitro* transcription by HelaScribe extracts. A control reaction was performed under standard manufacturer's instructions. Antibody depletion was performed as described in Methods. Here, Anti-HaloTag represents an antibody negative control to highlight the specific isolation of target proteins. Samples were normalized to a non-depleted control reaction (error bars represent SEM).

(b) Confirmation of antibody depletion. Western-blots are shown confirming the presence of MVI, NDP52 and RNAPII in the HelaScribe extracts (Pre). Depletion of the proteins by the corresponding antibodies is shown in the Post samples.

(c) *In vitro* transcription by HelaScribe extracts in the presence of competitor *Bacillus subtilis* Smc and ParB at 25  $\mu$ M. Both proteins were used as controls for DNA binding which may block transcription. As no decrease in transcription occurred, we conclude that the decrease in transcription observed with the CBD is related to its interaction with the RNAPII complex and not the interference by DNA binding. Samples were normalized to the control sample in Fig. 6e (error bars represent SEM).

(d) siRNA Knock-down of myosin VI. Western-blot on myosin VI in MCF7 cells under mock conditions and following transfection with MVI siRNA and control scrambled siRNA.

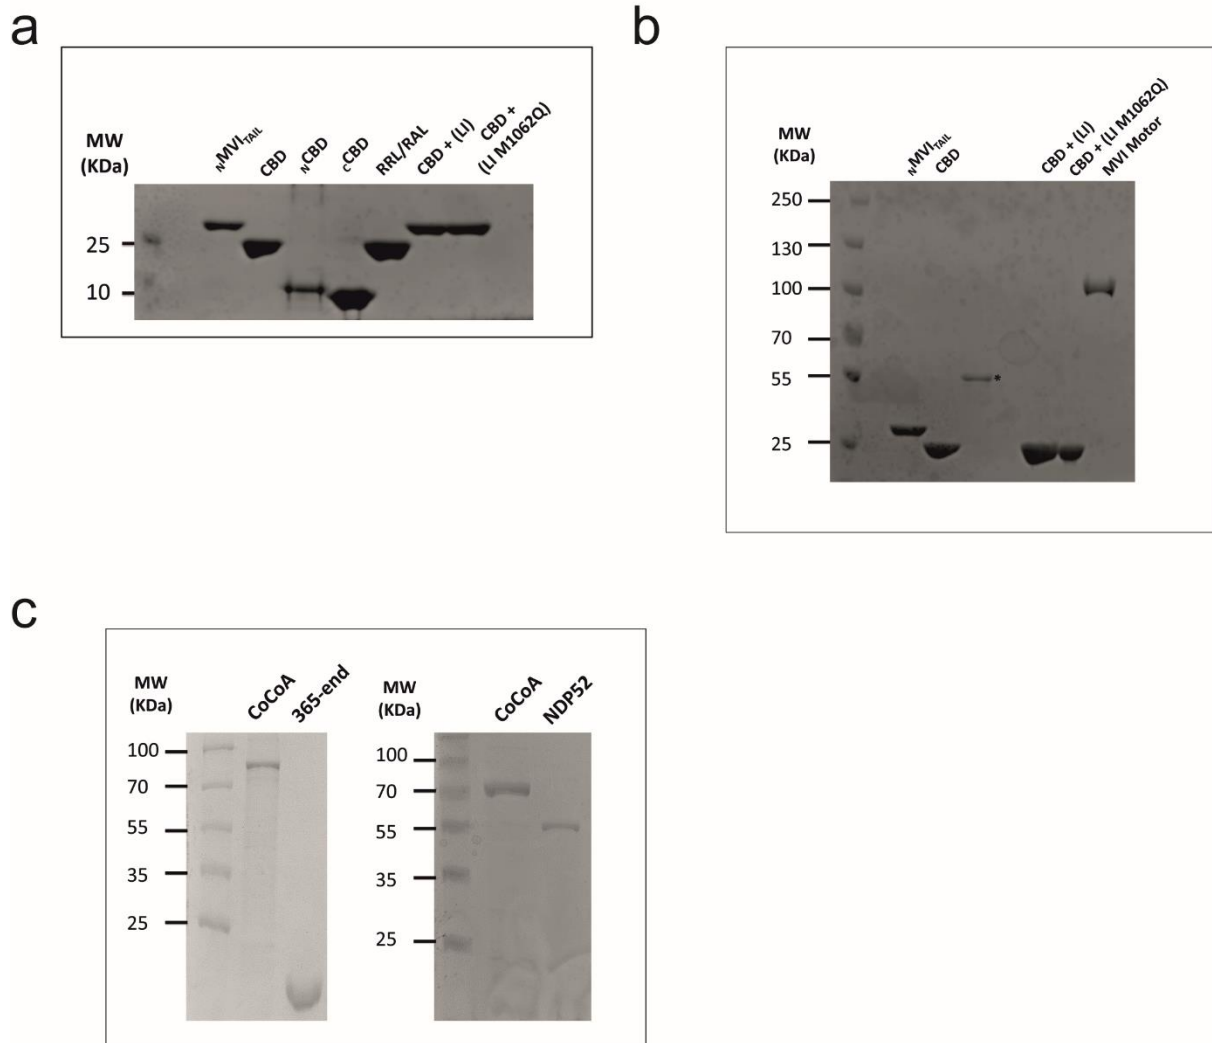

**Supplementary Figure 9.**

(a-b) Loading controls of recombinant proteins for assays performed in Fig. 4f and 7c.

(c) Loading controls of recombinant proteins for assay performed in Fig. 6c.

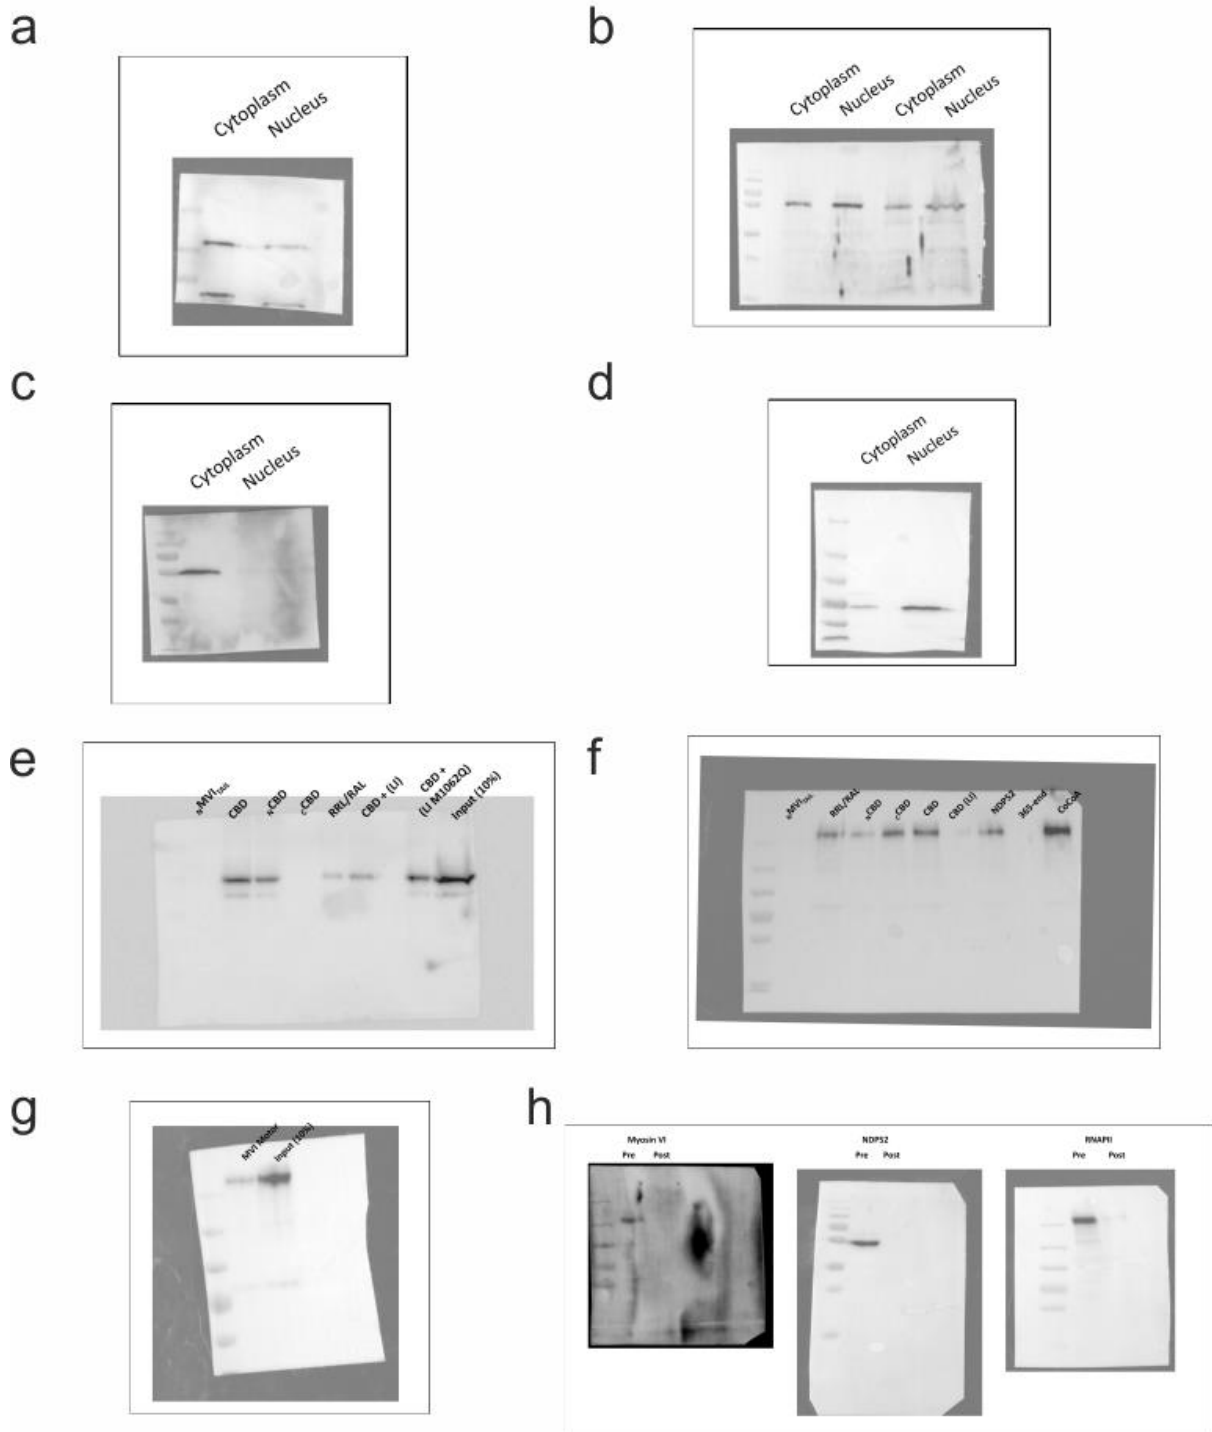

**Supplementary Figure 10.**

Uncropped Western-blots. (a) MVI From Fig. 1c. (b) NDP52 From Fig. 4c. (c) Tubulin from cell fractionation Fig. 1c and 4c. (d) Lamin B from cell fractionation Fig. 1c and 4c. (e) From Fig. 4f. (f) From Fig. 6c and 7c. (g) From Fig. 7c. (h) From Supplementary Fig. 8b.

**Supplementary Table 1. DNA Binding Prediction**

| <b>Residue</b> | <b>Amino acid</b> | <b>Output</b> | <b>Prediction</b> | <b>Confidence (0-1)</b> |
|----------------|-------------------|---------------|-------------------|-------------------------|
| 80             | R                 | 1.6914        | +                 | 0.9539                  |
| 83             | K                 | 1.4826        | +                 | 0.9152                  |
| 85             | R                 | 2.0163        | +                 | 0.9862                  |
| 118            | K                 | 1.5894        | +                 | 0.9373                  |
| 205            | R                 | 1.6289        | +                 | 0.9447                  |
| 276            | R                 | 1.7193        | +                 | 0.9594                  |
| 280            | R                 | 1.9585        | +                 | 0.9825                  |
| 365            | K                 | 1.6639        | +                 | 0.9493                  |
| 368            | S                 | 1.4254        | +                 | 0.9005                  |
| 393            | R                 | 1.854         | +                 | 0.9705                  |
| 632            | K                 | 1.4439        | +                 | 0.9023                  |
| 667            | R                 | 1.4925        | +                 | 0.9189                  |
| 708            | R                 | 1.9088        | +                 | 0.9788                  |
| 792            | R                 | 1.7813        | +                 | 0.965                   |
| 825            | R                 | 1.5331        | +                 | 0.9309                  |
| 831            | R                 | 1.4709        | +                 | 0.9124                  |
| 832            | R                 | 1.3556        | +                 | 0.8839                  |
| 834            | K                 | 1.1633        | +                 | 0.8166                  |
| 847            | K                 | 1.1978        | +                 | 0.8341                  |
| 849            | R                 | 1.2752        | +                 | 0.8553                  |
| 886            | K                 | 1.1943        | +                 | 0.8313                  |
| 937            | R                 | 1.2846        | +                 | 0.8627                  |
| 940            | R                 | 1.1816        | +                 | 0.824                   |
| 948            | R                 | 1.1761        | +                 | 0.823                   |
| 1035           | R                 | 0.9922        | +                 | 0.8235                  |
| 1036           | R                 | 1.038         | +                 | 0.8475                  |
| 1044           | K                 | 0.9667        | +                 | 0.806                   |
| 1049           | T                 | 0.9875        | +                 | 0.8217                  |
| 1050           | K                 | 1.0849        | +                 | 0.8714                  |
| 1055           | S                 | 0.9608        | +                 | 0.8041                  |
| 1056           | K                 | 1.1173        | +                 | 0.8862                  |
| 1063           | R                 | 1.1307        | +                 | 0.8917                  |
| 1085           | R                 | 1.0471        | +                 | 0.8548                  |
| 1094           | S                 | 1.4206        | +                 | 0.8995                  |
| 1095           | K                 | 1.9281        | +                 | 0.9816                  |
| 1096           | N                 | 1.3317        | +                 | 0.8774                  |
| 1097           | K                 | 1.4436        | +                 | 0.9023                  |
| 1098           | K                 | 1.7798        | +                 | 0.965                   |
| 1099           | R                 | 1.6503        | +                 | 0.9484                  |
| 1100           | N                 | 1.2231        | +                 | 0.8433                  |
| 1106           | R                 | 1.0999        | +                 | 0.8797                  |
| 1109           | K                 | 1.507         | +                 | 0.9235                  |
| 1112           | T                 | 1.0336        | +                 | 0.8447                  |
| 1126           | R                 | 1.0418        | +                 | 0.8502                  |
| 1137           | R                 | 1.1627        | +                 | 0.8147                  |
| 1155           | S                 | 1.1766        | +                 | 0.823                   |
| 1156           | K                 | 1.539         | +                 | 0.9318                  |
| 1157           | K                 | 1.1108        | +                 | 0.8797                  |
| 1158           | K                 | 1.5536        | +                 | 0.9336                  |
| 1205           | T                 | 0.9608        | +                 | 0.8041                  |
| 1206           | R                 | 1.8287        | +                 | 0.9687                  |
| 1207           | K                 | 1.1256        | +                 | 0.8908                  |
| 1208           | R                 | 1.4658        | +                 | 0.9115                  |
| 1237           | R                 | 1.4731        | +                 | 0.9134                  |
| 1240           | R                 | 1.7045        | +                 | 0.9548                  |
| 1242           | T                 | 1.1889        | +                 | 0.8286                  |
| 1243           | Y                 | 1.2152        | +                 | 0.8424                  |
| 1245           | T                 | 1.2904        | +                 | 0.8645                  |

**Supplementary Table 2. DNA Binding dissociation constants.**

| Construct                                       | DNA Substrate | Conditions              | Figure     | <i>K<sub>d</sub></i> ( $\mu\text{M}$ ) |
|-------------------------------------------------|---------------|-------------------------|------------|----------------------------------------|
| MVI                                             | ds40          |                         | 2a         | 3.5 +/- 0.7                            |
| Motor1-814                                      | ds40          |                         | 2a         | -                                      |
| MVITAIL                                         | ds40          |                         | 2a         | 2.5 +/- 0.4                            |
| NMVITAIL                                        | ds40          |                         | 2b         | 1.2 +/- 0.35                           |
| CBD                                             | ds40          |                         | 2b         | 0.1 +/- 0.02                           |
| CBD $\Delta\Sigma\text{I}\tau\epsilon\text{A}$  | ds40          |                         | 2e         | 0.11 +/- 0.04                          |
| NCBD                                            | ds40          |                         | 2e         | 1.3 +/- 0.7                            |
| CCBD                                            | ds40          |                         | 2e         | 0.12 +/- 0.03                          |
| CCBD $\Delta\Sigma\text{I}\tau\epsilon\text{B}$ | ds40          |                         | 2f         | 0.7 +/- 0.18                           |
| CCBD $\Delta\Sigma\text{I}\tau\epsilon\text{X}$ | ds40          |                         | 2f         | 0.5 +/- 0.15                           |
| MVITAIL (W1221A)                                | ds40          |                         | 3e         | 0.3 +/- 0.03                           |
| CBD                                             | ds15          |                         | Sup Fig 2a | 0.5 +/- 0.045                          |
| CBD                                             | ss20          |                         | Sup Fig 2a | 0.11 +/- 0.035                         |
| CBD                                             | dT20          |                         | Sup Fig 2a | 0.12 +/- 0.025                         |
| CBD                                             | ss40          |                         | Sup Fig 2a | 0.12 +/- 0.035                         |
| MVI                                             | ds40          | 5 $\mu\text{M}$ F-actin | Sup Fig 3f | 2.4 +/- 1.3                            |
| MVI                                             | ds40          | 1 mM $\text{Ca}^{2+}$   | Sup Fig 3f | 1.7 +/- 0.9                            |
| MVI                                             | ds40          | 2 mM ATP                | Sup Fig 3f | 2.5 +/- 1.1                            |
| MVI                                             | ds40          | F-actin + ATP           | Sup Fig 3f | 2.7 +/- 1.3                            |
| NDP52                                           | ds40          |                         | Sup Fig 4f | 0.08 +/- 0.025                         |

**Supplementary Table 3. Myosin VI – DNA Pre-steady-state kinetics.**

| Construct            | Association rate constant ( $\mu\text{M}^{-1} \text{s}^{-1}$ ) | Dissociation rate constant ( $\text{s}^{-1}$ ) |
|----------------------|----------------------------------------------------------------|------------------------------------------------|
| MVI                  | 9.1 +/- 1.5                                                    | 21.3 +/- 3.3                                   |
| MVI <sub>TAIL</sub>  | 9.4 +/- 1                                                      | 25.6 +/- 2.2                                   |
| NMVI <sub>TAIL</sub> | 17.4 +/- 2.2                                                   | 27.8 +/- 4.7                                   |
| CBD                  | 42.2 +/- 3.8                                                   | 13.3 +/- 3.9                                   |



**Supplementary Table 4. Protein-protein dissociation constants.**

| <b>Construct A</b> | <b>Construct B</b> | <b>Technique</b> | <b>Conditions</b> | <b>Figure</b> | <b>K<sub>d</sub> (μM)</b> |
|--------------------|--------------------|------------------|-------------------|---------------|---------------------------|
| NMVITAIL           | CBD                | FRET             |                   | 3a            | 4.5 +/- 0.6               |
| NMVITAIL           | CBD                | Anisotropy       |                   | Sup Fig 3d    | 4 +/- 0.4                 |
| CBD                | NMVITAIL           | Anisotropy       |                   | Sup Fig 3d    | 4.2 +/- 0.4               |
| NDP52              | MVITAIL            | FRET             |                   | 4d            | 3.2 +/- 1.2               |
| NDP52              | MVITAIL (LI)       | FRET             |                   | 4d            | 9.8 +/- 4.3               |
| NDP52              | MVITAIL (RRL/ARL)  | FRET             |                   | 4d            | 4.6 +/- 1.2               |
| NDP52              | MVITAIL (RRL/RAL)  | FRET             |                   | 4d            | 55 +/- 23                 |
| NDP52              | MVITAIL (RRL/RRA)  | FRET             |                   | 4d            | 21 +/- 11                 |
| NDP52              | MVITAIL (RRL/AAA)  | FRET             |                   | 4d            | 63 +/- 15                 |
| AF555-MVITAIL      | FITC-MVITAIL       | FRET             |                   | 5a            | 27 +/- 4.3                |
| AF555-MVITAIL      | FITC-MVITAIL       | FRET             | 20 μM NDP52       | 5a            | 2.3 +/- 0.8               |
| AF555-MVITAIL      | FITC-MVITAIL       | FRET             | 20 μM DNA         | 5a            | 29 +/- 5                  |
| AF555-MVITAIL      | FITC-MVITAIL       | FRET             | 20 μM NDP52/DNA   | 5a            | 2.5 +/- 1.2               |
| AF555-CBD          | FITC-CBD           | FRET             |                   | Sup Fig 5g    | 58 +/- 9.5                |
| AF555-CBD          | FITC-CBD           | FRET             | 20 μM NDP52       | Sup Fig 5i    | 51 +/- 7                  |
| AF555-NMVITAIL     | FITC-NMVITAIL      | FRET             |                   | Sup Fig 5f    | 3.1 +/- 1.4               |

**Supplementary Table 5. Recombinant DNA.**

| <b>Construct (Residue numbers)</b>                        | <b>Source</b>               |
|-----------------------------------------------------------|-----------------------------|
| Human pEGFP-C3 myosin VI (large insert) (1-1284)          | F. Buss (CIMR)              |
| Human pEGFP-C3 myosin VI M1062Q (large insert) (1-1284)   | S. Polo (IFOM)              |
| Human pEGFP-C3 myosin VI (non insert) (1-1253)            | F. Buss (CIMR)              |
| Human pEGFP-C3 myosin VI WKSKNKKR/WASANNNR (1-1253)       | F. Buss (CIMR)              |
| Human pFastBacHTB GFP NI myosin VI                        | F. Buss (CIMR)              |
| Xenopus pFastBac1 Calmodulin (1-end)                      | J. Sellers (NIH)            |
| Bacillus subtilis pET28 Smc hinge                         | S.Gruber (MPIB)             |
| Bacillus subtilis pET28 ParB (1-end)                      | S.Gruber (MPIB)             |
| pSG1365                                                   | S.Gruber (MPIB)             |
| Human pET151 GST ERalpha (1-end)                          | Synthetic Gene – This Study |
| Human pET151 NDP52 (1-end)                                | Synthetic Gene – This Study |
| Human pET151 NDP52 (365-end)                              | Synthetic Gene – This Study |
| Human pET151 EGFP-MVI <sub>TAIL</sub> -RFP (814-1253)     | Synthetic Gene – This Study |
| Human pET151 MVI <sub>TAIL</sub> (814-1253) W1221A        | Synthetic Gene – This Study |
| Human pET151 CBD (1060-end) W1221A                        | Synthetic Gene – This Study |
| Human pET151 CoCoA (1-end)                                | Synthetic Gene – This Study |
| Human pMX MVI (1184-1253)                                 | Synthetic Gene – This Study |
| Human pET151 MVI <sub>TAIL</sub> 814-1253                 | This Study                  |
| Human pET151 <sub>N</sub> MVI <sub>TAIL</sub> 814-1060    | This Study                  |
| Human pET28 CBD 1060-1253                                 | This Study                  |
| Human pET28 <sub>N</sub> CBD <sub>1060-1120</sub>         | This Study                  |
| Human pET28 <sub>C</sub> CBD <sub>1121-1253</sub>         | This Study                  |
| Human pET28 MVI <sub>TAIL</sub> (large insert) (814-1284) | This Study                  |
| Human pET28 CBD (large insert) (1037-1284)                | This Study                  |
| Human pET28 CBD M1062Q (large insert) (1037-1284)         | This Study                  |
| Human pFastbacHTB NI MVI (1-1253)                         | This Study                  |
| Human pFastbacHTB Motor <sub>1-814</sub>                  | This Study                  |
| Human pFastbacHTB Motor <sub>1-1060</sub>                 | This Study                  |
| Human pET28 CBD $\Delta$ Site A WKSKNKKR/WASANNNR (1060-  | This Study                  |
| Xenopus pET28 Calmodulin                                  | This Study                  |
| Human pET28 <sub>C</sub> CBD $\Delta$ Site B SKKK/AAAA    | This Study                  |
| Human pET28 <sub>C</sub> CBD $\Delta$ Site C TRKR/AAAA    | This Study                  |
| Human pET28 CBD RRL/RAL                                   | This Study                  |
| Human pET28 CBD LQSL/AQSAA                                | This Study                  |
| Human pET28 MVI <sub>TAIL</sub> RRL/RAL                   | This Study                  |
| Human pET28 MVI <sub>TAIL</sub> RRL/ARL                   | This Study                  |
| Human pET28 MVI <sub>TAIL</sub> RRL/RRA                   | This Study                  |
| Human pET28 MVI <sub>TAIL</sub> RRL/AAA                   | This Study                  |

**Supplementary Table 6. Primers for qPCR.**

| Sequence                   | Use                                        |
|----------------------------|--------------------------------------------|
| CATGGAGAACAAGGTGATCTG      | TFF1/PS2 qPCR For                          |
| CACTGTACACGTCTCTGTCTG      | TFF1/PS2 qPCR Rev                          |
| ATGGGAAATTCTTACGCTGGAC     | GREB1 qPCR For                             |
| CACTCGGCTACCACCTTCT        | GREB1 qPCR Rev                             |
| AGAGCTACGAGCTGCCTGAC       | Human B-Actin qPCR For                     |
| AGCACTGTGTTGGCGTACAG       | Human B-Actin qPCR Rev                     |
| AAGCTTCGATGATGGGCTTA       | ESR1 qPCR For                              |
| AGGTGGACCTGATCATGGAG       | ESR1 qPCR Rev                              |
| CCGAGCTCATCAGTGATGAGGC     | Myosin VI qPCR For                         |
| CCAAGCATGATACACTTTTAGTCTCC | Myosin VI qPCR Rev                         |
| AAGGGCATCGACTTCAAGGA       | CMV GFP RT-qPCR For In vitro Transcription |
| GGCGGATCTTGAAGTTCACC       | CMV GFP RT-qPCR Rev In vitro Transcription |

**Supplementary Table 7. DNA Substrates.**

| Sequence                                   | Use              |
|--------------------------------------------|------------------|
| TTAGTTGTTTCGTAGTGCTCGTCTGGCTCTGGATTACCCGC* | ds40 A 3'FAM     |
| GCGGGTAATCCAGAGCCAGACGAGCACTACGAACAATAA    | ds40 B           |
| TTAGTTGTTTCGTAGTGCTCGTCTGGCTCTGGATTACCCGC* | ss40 A 3'FAM     |
| TCTGGCTCTGGATTACCCGC*                      | ds20 A 3'FAM     |
| GCGGGTAATCCAGAGCCAGA                       | ds20 B           |
| TCTGGCTCTGGATTACCCGC*                      | ss20 A 3'FAM     |
| TTAGTTGTTCTCTGG*                           | 15 bp A 3'FAM    |
| CCAGAGAACAATAA                             | 15 bp B          |
| TTTTTTTTTTTTTTTTTTTT                       | dT <sub>20</sub> |

**Supplementary Table 8. PCR Primers.**

| <b>Sequence</b>                               | <b>Use</b>                                    |
|-----------------------------------------------|-----------------------------------------------|
| AGCTAGCTGCATGGCTGACCAACTG                     | pET28 Calmodulin For                          |
| TTTTGCGGCCGCTCACTTTGCTGTCATC                  | pET28 Calmodulin Rev                          |
| CTAGGCGGCCGCCCGAGGATGGAAAGCCCGTTTG            | pFastbacHTB NI Myosin VI                      |
| TTTTCTCGAGTTATTTCAACAGGTTCTGCAGCATG           | pFastbacHTB NI Myosin VI                      |
| CACC GAAGCCTGCATTAATAATGC                     | MVI <sub>TAIL</sub> 814-1253 For              |
| CTATTTCAACAGGTTCTGCAGCAT                      | MVI <sub>TAIL</sub> 814-1253 Rev              |
| CTAGGCGGCCGCCCGAGGATGGAAAGCCCGTTTG            | pFastBacHTB NI MVI                            |
| TTTTCTCGAGCTAGCATTTTAATGCAGGCTTC              | pFastBacHTB NI MVI                            |
| CTAGGCGGCCGCCCGAGGATGGAAAGCCCGTTTG            | pFastBacHTB NI MVI                            |
| TTTTCTCGAGCTAGATGGTATCACGTAGTTCTGC            | pFastBacHTB NI MVI                            |
| AGCTAGCGCAGAACTACGTGATACCATC                  | CBD For                                       |
| TTTTGCGGCCGCTATTTCAACAGGTTCTGCAGCAT           | CBD Rev                                       |
| AGCTAGCGCAGAACTACGTGATACCATC                  | <sub>N</sub> CBD For                          |
| TTTTGCGGCCGCTATGCTGGGTTTTGCTGAGG              | <sub>N</sub> CBD Rev                          |
| AGCTAGCGCTCAGATTCCTGCCAGG                     | <sub>c</sub> CBD For                          |
| TTTTGCGGCCGCTATTTCAACAGGTTCTGCAGCAT           | <sub>c</sub> CBD Rev                          |
| AGCTAGCGGGGCAGAACTCAGCACTG                    | CBD Plus LI For                               |
| TTTTGCGGCCGCTATTTCAACAGGTTCTGCAGCAT           | CBD Plus LI Rev                               |
| CACC GAAGCCTGCATTAATAATGC                     | <sub>N</sub> MVI <sub>TAIL</sub> For 814-1060 |
| CTAGATGGTATCACGTAGTTCTGC                      | <sub>N</sub> MVI <sub>TAIL</sub> Rev 814-1060 |
| AGCTAGCGCCGAACTGCGTGATACCA                    | CBD W1221A For                                |
| TTTTGCGGCCGCTATTATTTACAGCAGGCTCTGCAGC         | CBD W1221A Rev                                |
| CTTGCAGAGAAGAATTTTCATGCGGCAGCAAAAGTGTATCATGC  | RRL/AAA For                                   |
| GATTTCCAAGCATGATACTTTTGCTGCCGCATGAAATTCTTC    | RRL/AAA Rev                                   |
| CTTGCAGAGAAGAATTTTCATAGGAGAGCAAAAGTGTATCATGC  | RRL/RRA For (L1118A)                          |
| GATTTCCAAGCATGATACTTTTGCTCTCCTATGAAATTCTTC    | RRL/RRA Rev (L1118A)                          |
| CTTGCAGAGAAGAATTTTCATGCGGAGACTAAAAGTGTATCATGC | RRL/ARL For (R1116A)                          |
| GATTTCCAAGCATGATACTTTTAGTCTCGCATGAAATTCTTC    | RRL/ARL Rev (R1116A)                          |
| GCAGAGAAGAATTTTCATAGGGCACTAAAAGTGTATCATGCTTG  | RRL/RAL Rev (R1117A)                          |
| CCAAGCATGATACTTTTAGTGCCCTATGAAATTCTTCTCTGC    | RRL/RAL Rev (R1117A)                          |
| GACCCTCAGAGTGCGGCAGCAGGCTGGTGGTATGC           | SKKK/SAAA For                                 |
| GCATACCACCAGCCTGCTGCCGCACTCTGAGGGTC           | SKKK/SAAA Rev                                 |
| GACTGGCCTGACTCGGAAGCGTGGTGGTCTGAGATCTTG       | TRKR/TAAA For                                 |
| CAAGATCTCAGCACCCACGCTTCCGAGTCAGGCCAGTC        | TRKR/TAAA Rev                                 |
| GCCATGGCGCAGAACGCGGCGAAATAAGCCGAAG            | LQSL/AQSAA For                                |
| CTTCGGCTTATTTGCGCCGCTTCTGCGCCATGGC            | LQSL/AQSAA Rev                                |
| GATCGATAGTACATAAGGATTTCTTACGCG                | 500bp 5'Bio-Teg                               |
| CCAATTTTCGTTTGTGAACTAATGGGTGC                 | 500 bp Rev                                    |
